# Supplementary material for: Development of Hg2+ sensor based on N′-[1-(pyridin-2-yl)ethylidene]benzenesulfono-hydrazide (PEBSH) fabricated silver electrode for environmental remediation
Source: Royal Society of Chemistry journal article supplement (doi:10.1039/c5ra09399f), 2015-01-01
Supplement: c5ra09399f1.pdf [file c5ra09399f1.pdf]

**Development of Hg<sup>2+</sup> sensor based on N'-[1-(pyridin-2-yl)ethylidene]benzenesulfono -hydrazide (PEBSH) fabricated silver electrode for environmental remediation.**

**Muhammad Nadeem Arshad<sup>a,b</sup>, Mohammad M. Rahman<sup>a,b</sup>, Abdullah M. Asiri<sup>a,b</sup>, Tariq R. Sobahi<sup>a,b</sup>, Shu-Hong Yu<sup>c</sup>**

<sup>a</sup>Chemistry Department, Faculty of Science, King Abdulaziz University, Jeddah 21589, Saudi Arabia

<sup>b</sup>Center of Excellence for Advanced Materials Research (CEAMR), Faculty of Science, King Abdulaziz University, Jeddah 21589, Saudi Arabia

<sup>c</sup>Division of Nanomaterials and Chemistry, Hefei National Laboratory for Physical Sciences at Microscale, Collaborative Innovation Center of Suzhou Nano Science and Technology, Department of Chemistry, University of Science and Technology of China, Hefei, Anhui, 230026, China

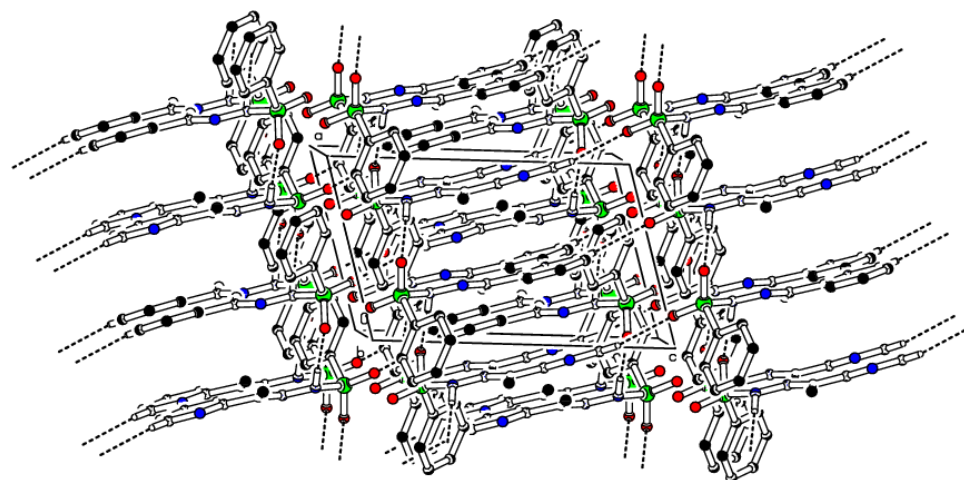

Figure S1 : Unit cell packing diagram of 1.

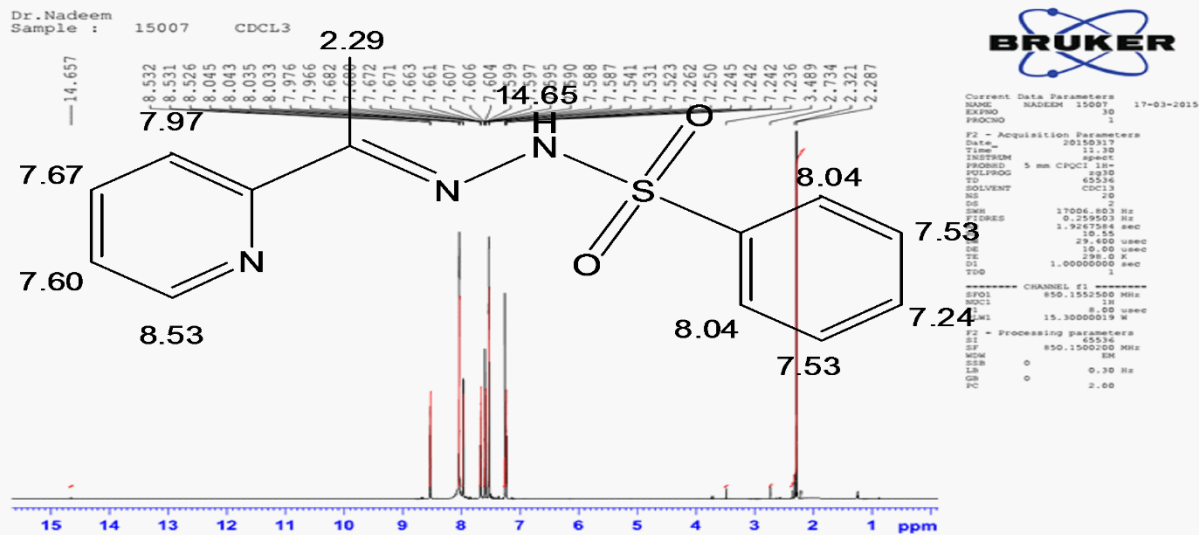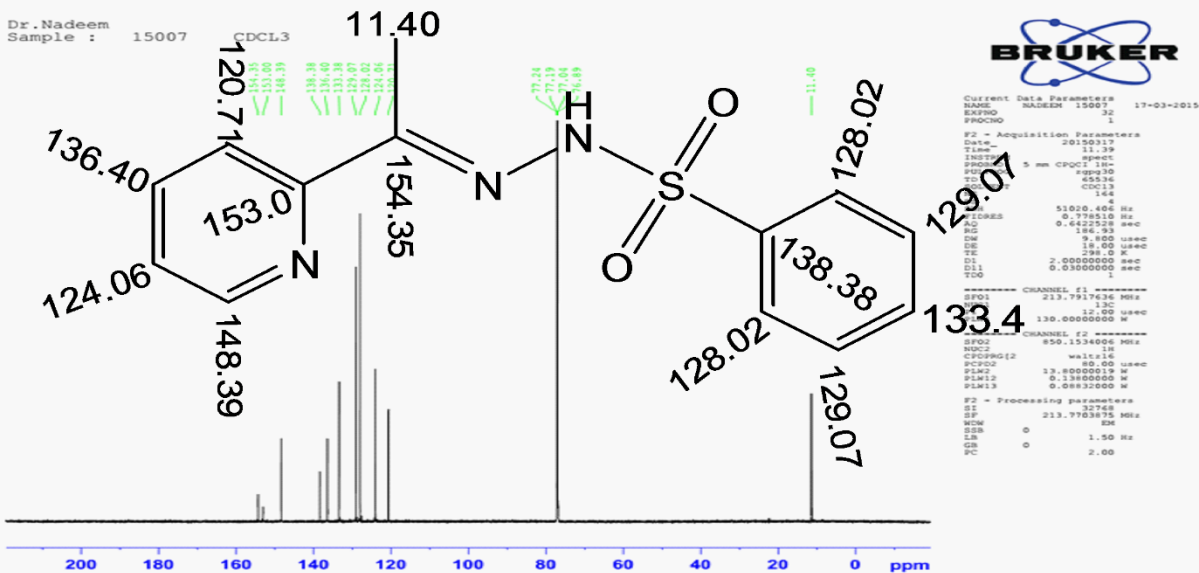

Figure S2: Proton & C-13 NMR spectra of PEBSH and characterization of respective  $^1\text{H}$  and  $^{13}\text{C}$  positions.

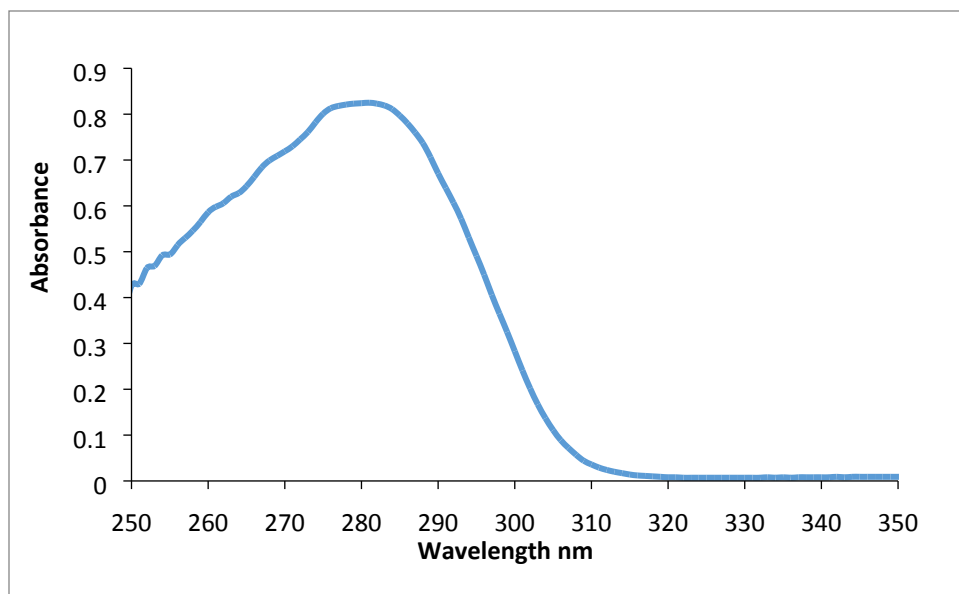

Figure S3: UV/VIS spectrum of PEBSH

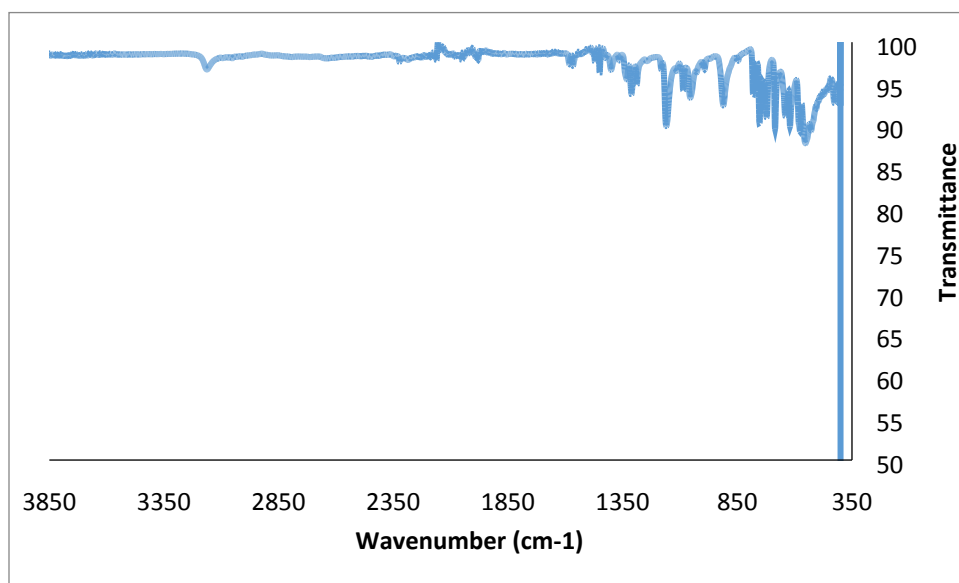

Figure S4: FTIR spectrum of PEBSH

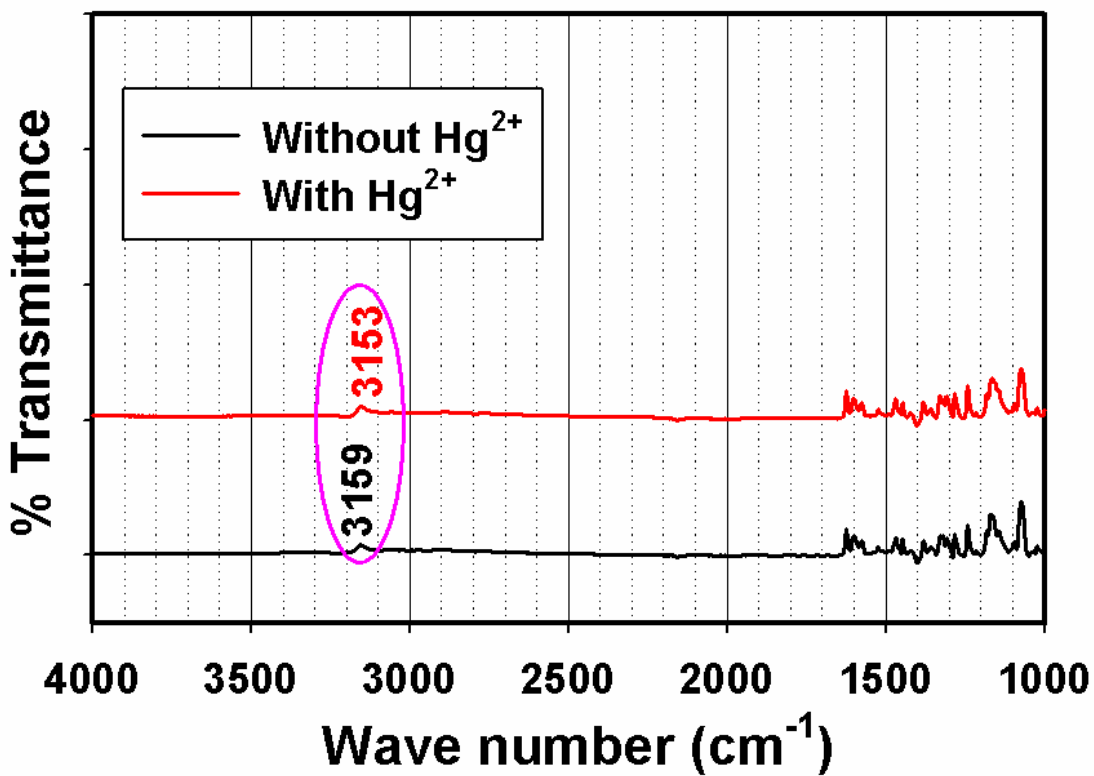

Figure S5: Comparative FTIR spectrums of PEBSH. Red color: In presence of Hg<sup>2+</sup>;  
Black color: In absence of Hg<sup>2+</sup> ion

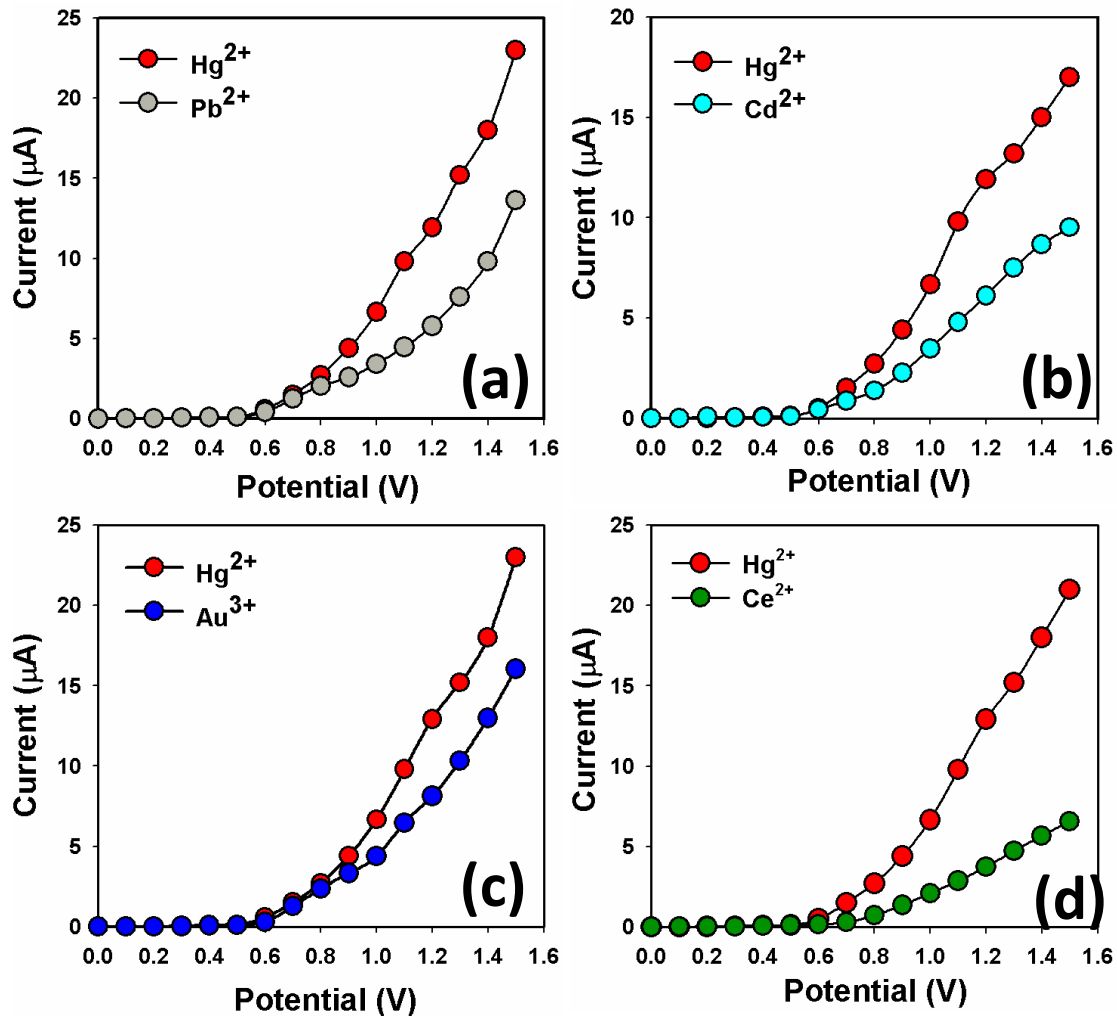

Figure S6: Here, it is investigated the I-V response of dual or complex matrices with and without  $\text{Hg}^{2+}$  in presence of other metallic ions. (a)  $\text{Hg}^{2+}$  and  $\text{Pb}^{2+}$ , (b)  $\text{Hg}^{2+}$  and  $\text{Cd}^{2+}$ , (c)  $\text{Hg}^{2+}$  and  $\text{Au}^{3+}$ , and (d)  $\text{Hg}^{2+}$  and  $\text{Ce}^{2+}$

| <b>Table S1 Crystal data and structure refinement for PEBSH.</b> |                                                                 |
|------------------------------------------------------------------|-----------------------------------------------------------------|
| CCDC number                                                      | 1063027                                                         |
| Empirical formula                                                | C <sub>13</sub> H <sub>13</sub> N <sub>3</sub> O <sub>2</sub> S |
| Formula weight                                                   | 275.32                                                          |
| Temperature/K                                                    | 293(2)                                                          |
| Crystal system                                                   | monoclinic                                                      |
| Space group                                                      | P2 <sub>1</sub> /a                                              |
| a/Å                                                              | 7.4145(6)                                                       |
| b/Å                                                              | 16.0955(16)                                                     |
| c/Å                                                              | 11.8314(10)                                                     |
| α/°                                                              | 90                                                              |
| β/°                                                              | 105.632(9)                                                      |
| γ/°                                                              | 90                                                              |
| Volume/Å <sup>3</sup>                                            | 1359.7(2)                                                       |
| Z                                                                | 4                                                               |
| ρ <sub>calc</sub> /g/cm <sup>3</sup>                             | 1.345                                                           |
| μ/mm <sup>-1</sup>                                               | 0.239                                                           |
| F(000)                                                           | 576.0                                                           |
| Crystal size/mm <sup>3</sup>                                     | 0.14 × 0.17 × 0.43                                              |
| Radiation                                                        | MoKα (λ = 0.71073)                                              |
| 2θ range for data collection/°                                   | 6.198 to 58.728                                                 |
| Index ranges                                                     | -9 ≤ h ≤ 10, -22 ≤ k ≤ 19, -13 ≤ l ≤ 15                         |
| Reflections collected                                            | 7815                                                            |
| Independent reflections                                          | 3293 [R <sub>int</sub> = 0.0264, R <sub>sigma</sub> = 0.0354]   |
| Data/restraints/parameters                                       | 3293/0/175                                                      |
| Goodness-of-fit on F <sup>2</sup>                                | 1.069                                                           |
| Final R indexes [I ≥ 2σ (I)]                                     | R <sub>1</sub> = 0.0493, wR <sub>2</sub> = 0.1193               |
| Final R indexes [all data]                                       | R <sub>1</sub> = 0.0735, wR <sub>2</sub> = 0.1369               |
| Largest diff. peak/hole / e Å <sup>-3</sup>                      | 0.22/-0.33                                                      |

**Table S2 Selected bond lengths for PEBSH**

| Atom | Atom | Length/Å   |
|------|------|------------|
| C1   | S1   | 1.757(2)   |
| C7   | N2   | 1.283(3)   |
| C8   | N3   | 1.335(3)   |
| C12  | N3   | 1.338(3)   |
| N1   | N2   | 1.402(2)   |
| N1   | S1   | 1.6461(18) |
| O1   | S1   | 1.4234(16) |
| O2   | S1   | 1.4295(17) |

**Table S3 Selected bond angles for PEBSH**

| Atom | Atom | Atom | Angle/°    |
|------|------|------|------------|
| C2   | C1   | S1   | 118.98(17) |
| N2   | C7   | C8   | 114.54(19) |
| N2   | C7   | C13  | 125.67(18) |
| N3   | C8   | C7   | 116.1(2)   |
| N3   | C8   | C9   | 122.41(19) |
| N3   | C12  | C11  | 124.8(3)   |
| N2   | N1   | S1   | 112.77(14) |
| C7   | N2   | N1   | 116.68(18) |
| C8   | N3   | C12  | 116.7(2)   |
| N1   | S1   | C1   | 108.42(9)  |
| O1   | S1   | C1   | 109.58(10) |
| O1   | S1   | N1   | 104.67(10) |
| O1   | S1   | O2   | 119.90(11) |
| O2   | S1   | C1   | 107.46(11) |
| O2   | S1   | N1   | 106.31(10) |
